# Supplementary material for: Integrated Bioinformatical Analysis Identified HTRA4 As An Immune-Related Prognostic Biomarker In The Gastric Cancer Microenvironment
Source: Research Square preprint supplement (doi:10.21203/rs.3.rs-770613/v1), 2021-08-13
Supplement: Supplementary file 1 [file 001ff7a6ea0bba55182fe538.docx]

| 178 differential genes | COL1A2、COL5A1、COL1A1、INHBA、COL6A3、SPARC、SERPINH1、COL8A1、FAP、COL5A2、CDH11、EDNRA、PRRX1、SULF1、FN1、NID2、PDGFRB、BGN、COL12A1、THY1、RAB31、AKR7A3、THBS2、COL4A1、COL4A2、TIMP1、BICC1、CTSK、APOC1、TGFBI、GPNMB、TMEM158、ADAMTS12、TEAD4、COL6A1、METTL7A、PDLIM7、ACTN1、CLDN1、CTHRC1、FMO5、CDH3、PBLD、LOXL2、VSIG2、CEBPB、SULF2、SEMA7A、CD109、PMEPA1、S100A4、MMD、TNFRSF11B、VASH1、SPP1、OLFML2B、TMED6、TNFRSF25、HTRA1、SULT1B1、VSTM2A、PLAU、FSCN1、SRPX2、IGF2BP3、TMEM116、CDC25B、PLEKHG2、E2F3、GRIA3、GCNT2、DNM1、IL24、HPGD、NRP2、PTPRZ1、AKR1C3、FBP2、ATP11A、MAOA、SLC39A10、ENG、C16orf89、MAP4K4、TRIO、KRT80、ITGAX、KIF26B、SYTL2、ASPA、CPVL、DPT、FKBP10、ESRRG、FGD6、PDPN、ADH7、KRT7、SEPP1、CAPN13、BAG2、TNFRSF10B、EPPK1、THBS1、KLHL29、GSTA3、TGM2、ITGA5、CD36、EPHB1、SLC28A2、PLA2G7、FGFR4、LRP8、MAMDC2、CRISPLD1、NT5DC2、MMP7、RAD54L、FXYD5、AKR1C1、CTSB、S100A3、FAM83D、KCNMB2、GCNT1、OLR1、DUXAP10、KIF14、COL7A1、WNT5A、KLK10、SCIN、SLC26A7、ADAMTS6、LY6E、PHF19、KIF23、AHNAK2、DIO2、CCNE1、SNX10、ADAMTSL1、FOXC1、OSM、HBB、SLCO4A1、PIK3C2G、TACC3、ESM1、WNT2、LMNB2、TNFRSF12A、PRC1、VWA1、ABCA8、HTRA4、TREM1、KIF4A、PRLR、SERPINE1、GSTA1、ADH1B、MSR1、CLEC4A、AGPAT4、UBE2C、TPX2、KRT20、BMP5、SLC4A11、CASS4、CENPI、ADH1C、SLC1A3、FCGR2A、CD300A、KIF20B |
| --- | --- |
