# Supplementary material for: Integrated Bioinformatical Analysis Identified HTRA4 As An Immune-Related Prognostic Biomarker In The Gastric Cancer Microenvironment
Source: Research Square preprint supplement (doi:10.21203/rs.3.rs-770613/v1), 2021-08-13
Supplement: Supplementary file 2 [file 63efb3dd20df7cf0d44860e3.docx]

| NAME | SIZE | ES | NES | NOM p-val | FDR q-val |
| --- | --- | --- | --- | --- | --- |
| KEGG_ANTIGEN_PROCESSING_AND_PRESENTATION | 81 | 0.729168 | 2.280343 | 0 | 6.22E-04 |
| KEGG_VIRAL_MYOCARDITIS | 68 | 0.698614 | 2.233151 | 0 | 0.001117 |
| KEGG_SYSTEMIC_LUPUS_ERYTHEMATOSUS | 55 | 0.793135 | 2.208767 | 0 | 0.001166 |
| KEGG_NATURAL_KILLER_CELL_MEDIATED_CYTOTOXICITY | 132 | 0.607687 | 2.17619 | 0.001916 | 0.001424 |
| KEGG_INTESTINAL_IMMUNE_NETWORK_FOR_IGA_PRODUCTION | 46 | 0.789486 | 2.118194 | 0.001972 | 0.002473 |
| KEGG_TYPE_I_DIABETES_MELLITUS | 41 | 0.800728 | 2.101671 | 0 | 0.003042 |
| KEGG_AUTOIMMUNE_THYROID_DISEASE | 50 | 0.718917 | 2.082485 | 0 | 0.003683 |
| KEGG_ALLOGRAFT_REJECTION | 35 | 0.837767 | 2.027017 | 0 | 0.007296 |
| KEGG_GRAFT_VERSUS_HOST_DISEASE | 37 | 0.846334 | 2.025151 | 0 | 0.006828 |
| KEGG_PRION_DISEASES | 35 | 0.656245 | 2.024912 | 0.003697 | 0.00628 |
| KEGG_LEISHMANIA_INFECTION | 70 | 0.694442 | 1.994441 | 0.003846 | 0.008657 |
| KEGG_TOLL_LIKE_RECEPTOR_SIGNALING_PATHWAY | 102 | 0.560706 | 1.959248 | 0.001949 | 0.012291 |
| KEGG_CELL_ADHESION_MOLECULES_CAMS | 131 | 0.615201 | 1.936237 | 0.004049 | 0.014595 |
| KEGG_ASTHMA | 28 | 0.7329 | 1.916374 | 0.005848 | 0.01809 |
| KEGG_CYTOKINE_CYTOKINE_RECEPTOR_INTERACTION | 264 | 0.531602 | 1.916224 | 0 | 0.016884 |
| KEGG_HEMATOPOIETIC_CELL_LINEAGE | 85 | 0.616985 | 1.896865 | 0.011834 | 0.019729 |
| KEGG_T_CELL_RECEPTOR_SIGNALING_PATHWAY | 108 | 0.578829 | 1.878515 | 0.012 | 0.022613 |
| KEGG_CHEMOKINE_SIGNALING_PATHWAY | 188 | 0.540213 | 1.865954 | 0.011788 | 0.024117 |
| KEGG_LYSOSOME | 121 | 0.563572 | 1.832166 | 0.015779 | 0.031696 |
| KEGG_PRIMARY_IMMUNODEFICIENCY | 35 | 0.725664 | 1.776166 | 0.016194 | 0.04965 |
